# Supplementary material for: The beneficial effects of Lactobacillus reuteri ADR-1 or ADR-3 consumption on type 2 diabetes mellitus: a randomized, double-blinded, placebo-controlled trial
Source: PubMed Central journal article supplement (PMC6235926; doi:10.1038/s41598-018-35014-1), 2018-11-14
Supplement: 41598_2018_35014_MOESM1_ESM.pdf [file 41598_2018_35014_MOESM1_ESM.pdf]

**The beneficial effects of *Lactobacillus reuteri* ADR-1 or ADR-3 consumption on type 2 diabetes mellitus: a randomized, double-blinded, placebo-controlled trial**

Ming-Chia Hsieh, Wan-Hua Tsai, Yu-Pang Jheng, Shih-Li Su, Shu-Yi Wang, Chi-Chen Lin, Yi-Hsing Chen, Wen-Wei Chang

## Supporting Information

### Figures

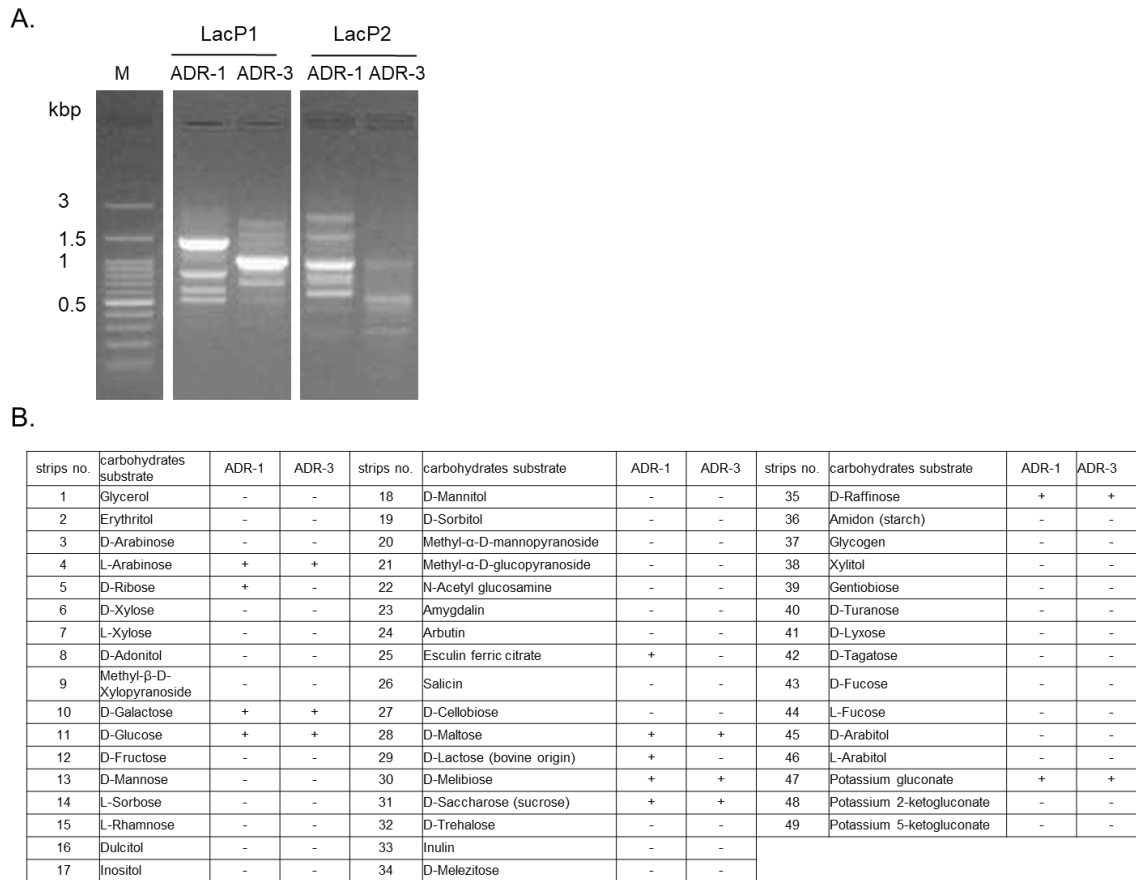

**Fig. S1 ADR-1 and ADR-3 were different strains of *L. reuteri*.** (A) RAPD profiles of *L. reuteri* ADR-1 and ADR-3 DNA were amplified by primers of LacP1 (5'-ACGCGCCCT-3' or LacP2 (5'-ATGTAACGCC-3') using PCR reaction followed by DNA gel analysis. The results showed ADR-1 and ADR-3 were differential strains with individual RAPD profile. (B) Fermentation of carbohydrates ability was determined with API 50 CHL kit. Carbohydrate utilization patterns of ADR-1 or ADP-3 was summarized in this table. These data analyzed by website (<https://apiweb.biomerieux.com/jsp/ident/index.jsp>) and it was indicated that ADR-1 and ADR-3 were identified as *L. reuteri*. However, ADR-1 fermented CHO ability was different from ADR-3 at strips no.-5、-25、-29, suggesting that they were different strains of *L. reuteri*.

A.

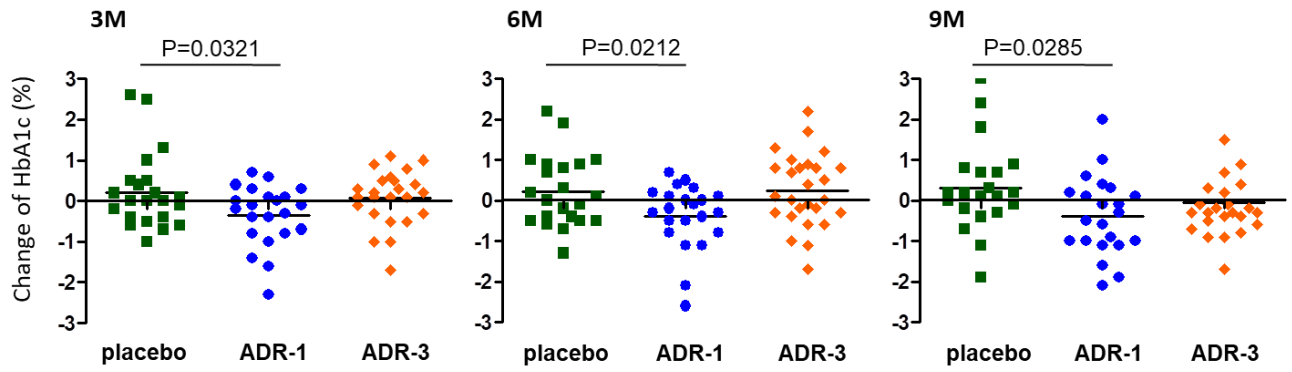

B.

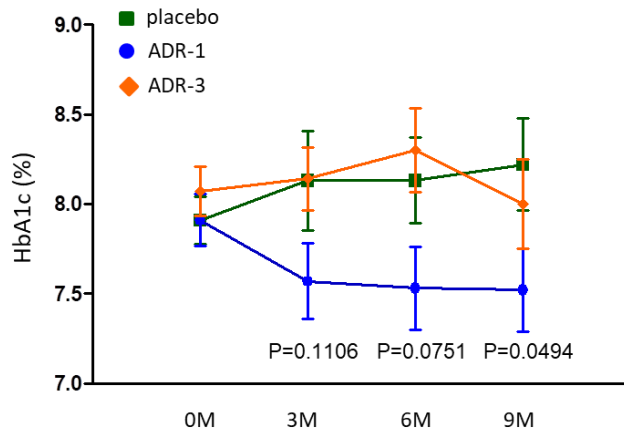

**Fig. S2. The serum level of HbA1c among *L. reuteri* consumption or placebo groups.** The blood samples of participates were collected at different time point (3, 6 or 9 month) as indicated in Fig. 2B and measured serum HbA1c level. (B) The changes of serum HbA1c level with time in different groups.

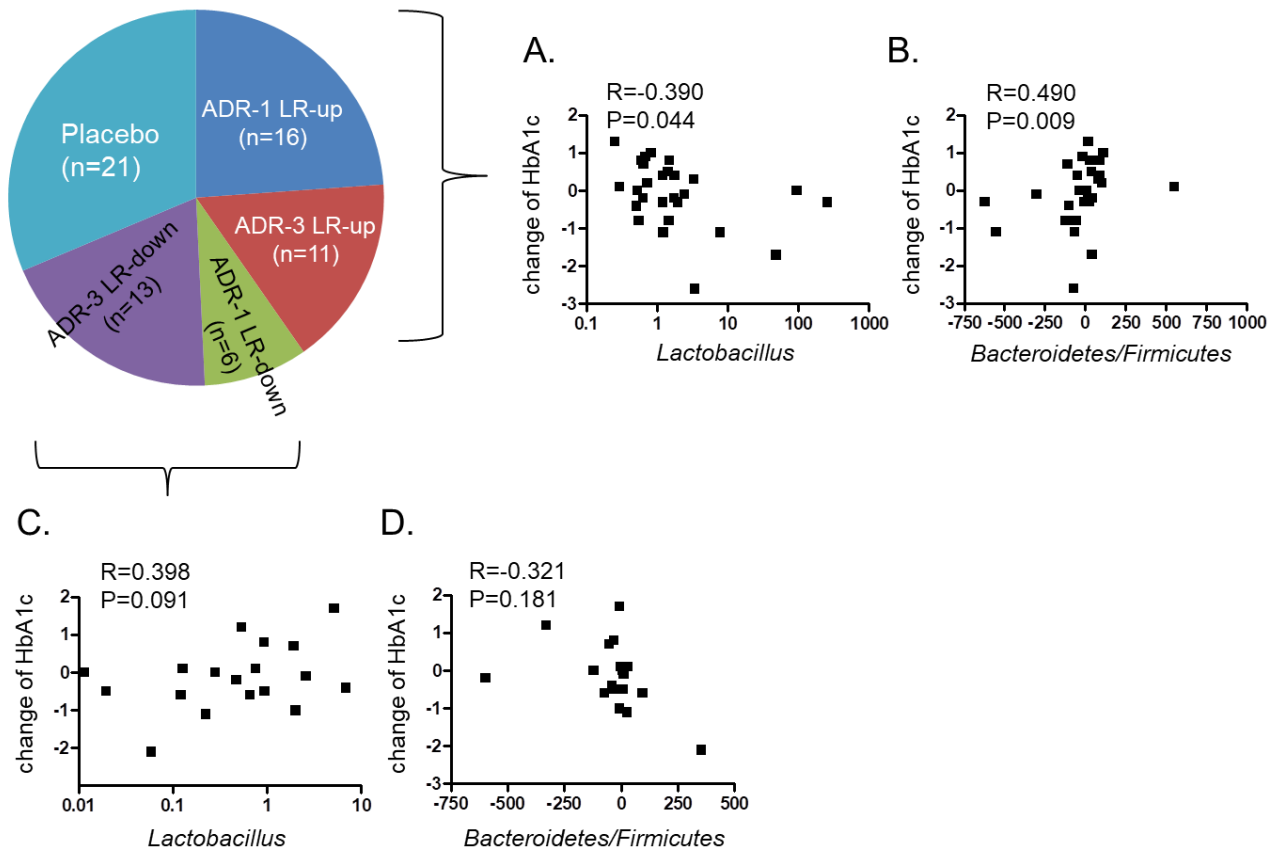

**Fig. S3. The association between serum HbA1c level and *Lactobacillus* spp. or ratio of *Bacteroidetes/Firmicutes* among groups with different changes of *L. reuteri* level.** The blood and fecal samples of participants at starting time point and 6 month after *L. reuteri* consumption were collected and measured the serum HbA1c level and fecal microflora as described in “Materials and Methods” section. The association between of serum HbA1c level and *Lactobacillus* spp. (A, C), ratio of *Bacteroidetes/Firmicutes* (B, D) in ADR-1 or ADR-3 consumption participants with up-regulated *L. reuteri* level (LR-up, A and B) or with down-regulated *L. reuteri* level (LR-down, C and D) was calculated by Spearman's rho correlation analysis.

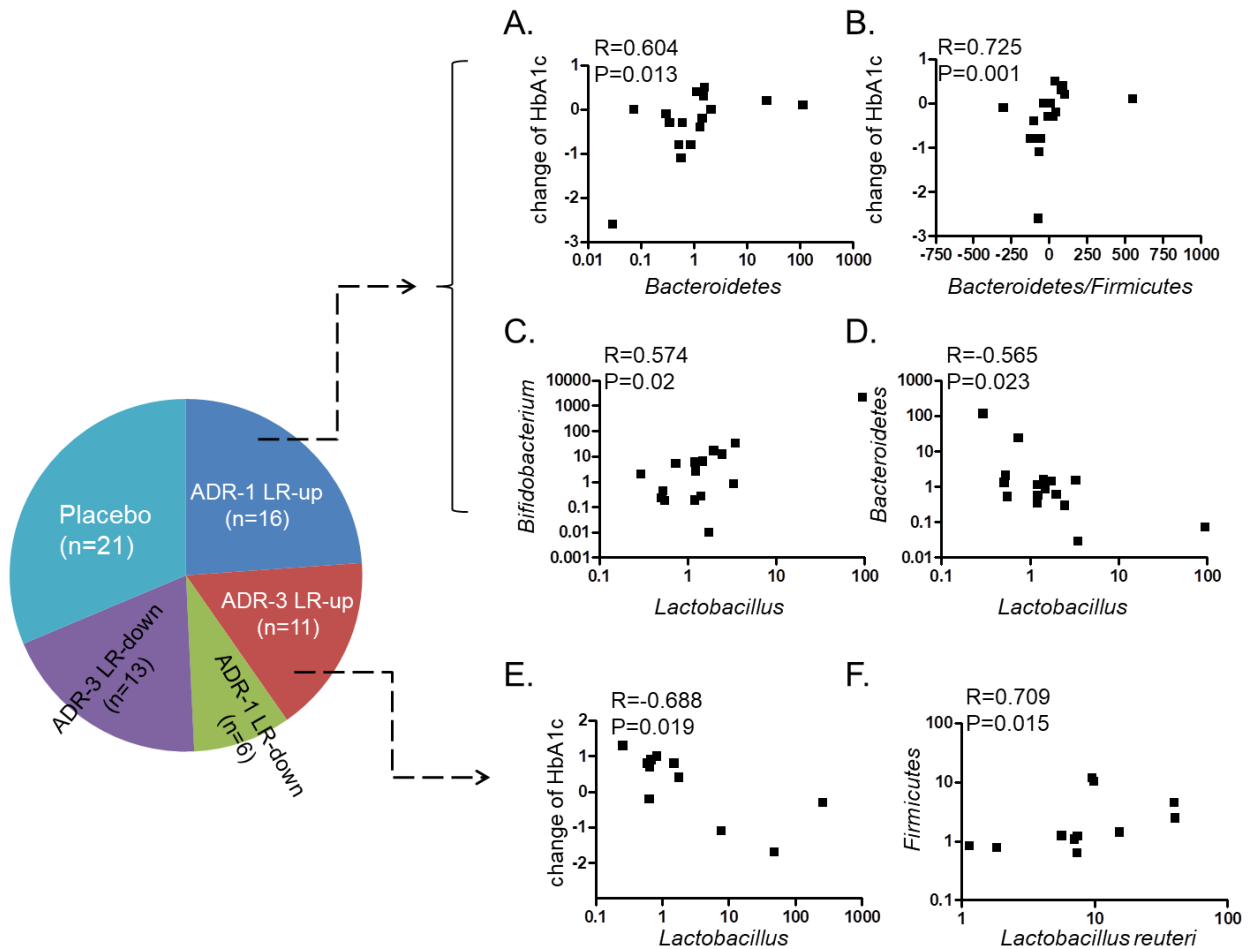

**Fig. S4. The association between serum HbA1c level and fecal microbials in ADR-1 or ADR-3 consumption participants with up-regulated *L. reuteri* level.** The blood and fecal samples of participants at starting time point and 6 month after *L. reuteri* consumption were collected and measured the serum HbA1c level and fecal microflora as described in “Materials and Methods” section. (A, B) The association between the change of serum HbA1c level and *Bacteroidetes* (A) or ratio of *Bacteroidetes/Firmicutes* in ADR-1 intake participants with up-regulated *L. reuteri* level (LR-up). (C, D) The association between *Bifidobacterium* spp. and *Lactobacillus* spp. (C) or between *Bacteroidetes* and *Lactobacillus* spp. in ADR-1 intake participants with LR-up was calculated by Spearman's rho correlation analysis. (E, F) The association between the change of serum HbA1c level and *Lactobacillus* spp. (E) or between *Firmicutes* and *L. reuteri* (F) in ADR-3 intake participants with down-regulated *L. reuteri* level (LR-down) was calculated by Spearman's rho correlation analysis.

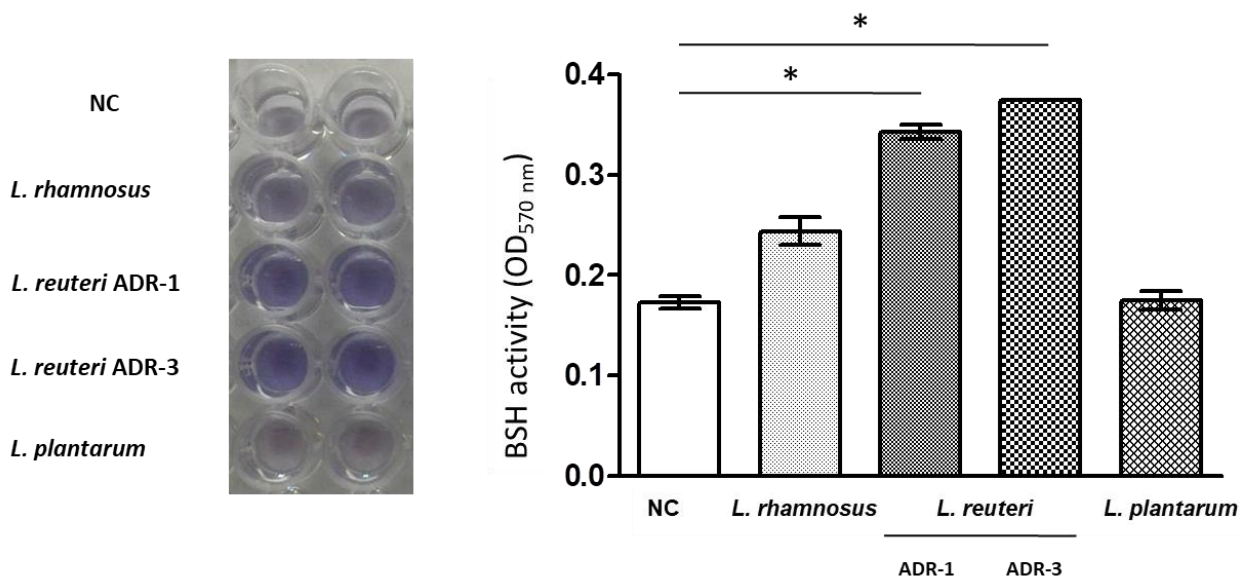

**Fig. S5. Bile salt hydrolase (BSH) activity of ADR-1 and ADR-3.** Live bacterial culture from *L. rhamnosus*, *L. plantarum*, *L. reuteri* ADR-1 or ADR-3 was used to compare their abilities to de-conjugate bile acids TDCA (Taurodeoxycholic acid sodium salt). After incubation, conjugated bile acids were precipitated with 15% TCA (Trichloroacetic acid) and removed. The unconjugated bile acid was reacted with ninhydrin reagent (left panel) and measured the absorbance at 570 nm wavelength (right panel). The absorbance values indicated the BSH activity of bacteria. NC, negative control (MRS broth). \*,  $P < 0.05$ .

All case (N=67)

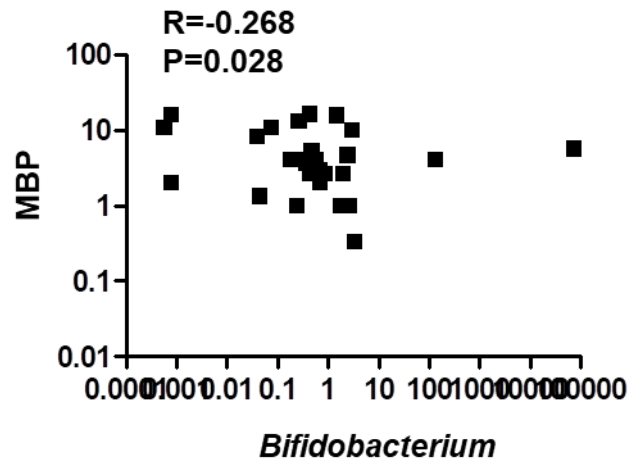

**Fig. S6. The association between mean blood pressure (MBP) and fecal level of *Bifidobacterium spp.* in all participates.** The fecal samples of all participates (n=67) at starting time point and 6 month after *L. reuteri* or placebo consumption were collected and measured the changes of *Bifidobacterium spp.* level with quantitative PCR method as described in “Materials and Methods” section. The changes of MBP in participates were calculated by the data at 6 month after trial divided by the data at starting point.

Tables

**Table S1. Sequences of primer sets used in this study for the determination of fecal microflora.**

| Target                         | Name          | Sequence (5'-3')               |
|--------------------------------|---------------|--------------------------------|
| <i>Lactobacillus spp.</i>      | LactoF        | TGGAAACAGRTGCTAATACCG          |
|                                | LactoR        | GTCCATTGTGGAAGATTCCC           |
| <i>Bifidobacterium spp.</i>    | F-bifido      | CGCGTCYGGTGTGAAAG              |
|                                | R-bifido      | CCCCACATCCAGCATCCA             |
| Total bacteria                 | Total-F       | GTGSTGCAYGGYTGTCGTCA           |
|                                | Total-R       | ACGTCRTCCMCACCTTCCTC           |
| <i>Akkermansia muciniphila</i> | AM1-F         | CAGCACGTGAAGGTGGGGAC           |
|                                | AM1-R         | CCTTGCGGTTGGCTTCAGAT           |
| <i>Clostridium</i> cluster I   | C_clu-F       | TACCHRAGGAGGAAGCCAC            |
|                                | C_clu-R       | GTTCTTCCTAATCTCTACGCAT         |
| <i>Lactobacillus reuteri</i>   | Hsp_Reuteri_F | GCGTTGATGTTGTTGAAGGAATGAGCTTTG |
|                                | Hsp_Reuteri_R | CATCAGCAATGATTAAGAGAGCACGGCC   |
| <i>Bacteroidetes</i>           | Bfr230F       | CTGAACCAGCCAAGTAGCG            |
|                                | Bfr230R       | CCGCAAACCTTTCACAACCTGACTTA     |
| <i>Firmicutes</i>              | Firm200CF     | TGAAACTCAAAGGAATTGACG          |
|                                | Firm200CR     | ACCATGCACCACCTGTC              |



**Table S2. Characteristics of study participates at baseline<sup>a</sup>.**

|                          | Placebo     | ADR-1        |                      | ADR-3        |                      |
|--------------------------|-------------|--------------|----------------------|--------------|----------------------|
| Baseline                 | N=22        | N=22         | P-value <sup>b</sup> | N=24         | P-value <sup>b</sup> |
| Male                     | 13 (59.1%)  | 12 (54.5%)   | 0.7609               | 13 (54.2%)   | 0.7365               |
| Female                   | 9 (40.9%)   | 10 (45.5%)   |                      | 11 (45.8%)   |                      |
| Age                      | 55.77±8.55  | 52.32±10.20  | 0.2302               | 53.88±7.78   | 0.4346               |
| Height (cm)              | 161.80±7.28 | 163.00±7.92  | 0.6173               | 162.00±7.83  | 0.9176               |
| Weight (kg)              | 72.40±11.64 | 74.97±15.73  | 0.5408               | 73.77±12.54  | 0.7043               |
| BMI (kg/m <sup>2</sup> ) | 27.53±3.15  | 28.04±4.29   | 0.6587               | 28.03±3.88   | 0.6374               |
| SBP (mmHg)               | 126.80±9.93 | 126.20±13.08 | 0.8668               | 132.90±16.93 | 0.1378               |
| DBP (mmHg)               | 75.32±9.09  | 76.68±8.87   | 0.6172               | 76.08±6.93   | 0.7484               |
| Waist circumference (cm) | 95.45±10.59 | 95.94±12.00  | 0.8873               | 96.19±9.00   | 0.7998               |
| Hip circumference (cm)   | 100.00±7.66 | 101.90±10.86 | 0.5073               | 101.10±7.95  | 0.6476               |
| AST (U/L)                | 31.73±14.65 | 30.91±10.39  | 0.8319               | 32.38±17.84  | 0.8941               |
| ALT (U/L)                | 39.59±23.11 | 38.77±15.88  | 0.8918               | 43.71±27.67  | 0.5885               |
| HbA1c (%)                | 7.91±0.62   | 7.91±0.68    | >0.999               | 8.07±0.67    | 0.4252               |

Abbreviations: BMI, body mass index; SBP, systolic blood pressure; DBP, diastolic blood pressure; AST, aspartate aminotransferase; ALT, alanine aminotransferase.

<sup>a</sup> All the data were collected at first visit.

<sup>b</sup> Chi-square test (for gender) or two sample *t*-test analysis (for other factors) was used to compare mean values between placebo and ADR-1 or ADR-3 groups.

**Table S3. Medical history of study participates<sup>a</sup>.**

| Variable                           | placebo<br>(N=22) | ADR-1<br>(N=22) | P-value <sup>b</sup> | ADR-3<br>(N=24) | P-value <sup>b</sup> |
|------------------------------------|-------------------|-----------------|----------------------|-----------------|----------------------|
| <b>Medical History</b>             |                   |                 |                      |                 |                      |
| Hypercholesterolemia               | 18 ( 81.8%)       | 18 ( 81.8%)     | >0.99                | 22 ( 91.7%)     | 0.41                 |
| Hypertension                       | 16 ( 72.7%)       | 18 ( 81.8%)     | 0.72                 | 17 ( 70.8%)     | >0.99                |
| <b>Medication for diabetes</b>     |                   |                 |                      |                 |                      |
| Insulin                            | 5 ( 22.7%)        | 3 ( 13.6%)      | 0.70                 | 5 ( 20.8%)      | >0.99                |
| Metformin                          | 20 ( 90.9%)       | 20 ( 90.9%)     | >0.99                | 22 ( 91.7%)     | >0.99                |
| Sulphonylurea                      | 16 ( 72.7%)       | 14 ( 63.6%)     | 0.75                 | 18 ( 75.0%)     | >0.99                |
| <b>DDP-4 inhibitor</b>             |                   |                 |                      |                 |                      |
| Sitagliptin                        | 4 ( 18.2%)        | 2 ( 9.1%)       | 0.66                 | 2 ( 8.3%)       | 0.41                 |
| Vildagliptin                       | 2 ( 9.1%)         | 3 ( 13.6%)      | >0.99                | 2 ( 8.3%)       | >0.99                |
| Saxagliptin                        | 12 ( 54.6%)       | 9 ( 40.9%)      | 0.55                 | 10 ( 41.7%)     | 0.56                 |
| Linagliptin                        | 7 ( 31.8%)        | 5 ( 22.7%)      | 0.74                 | 8 ( 33.3%)      | >0.99                |
| <b>GLP-1 Receptor agonists</b>     |                   |                 |                      |                 |                      |
| Exenatide                          | 0 ( 0.0%)         | 1 ( 4.6%)       | >0.99                | 2 ( 8.3%)       | 0.49                 |
| Liraglutide                        | 0 ( 0.0%)         | 3 ( 13.6%)      | 0.23                 | 2 ( 8.3%)       | 0.49                 |
| Acarbose                           | 6 ( 27.3%)        | 5 ( 22.7%)      | >0.99                | 2 ( 8.3%)       | 0.13                 |
| <b>Medication for Hypertension</b> |                   |                 |                      |                 |                      |
| Diuretics                          | 6 ( 27.3%)        | 4 ( 18.2%)      | 0.72                 | 8 ( 33.3%)      | 0.75                 |
| Beta-blockers                      | 6 ( 27.3%)        | 7 ( 31.8%)      | >0.99                | 9 ( 37.5%)      | 0.54                 |
| Alpha/ Beta-blockers               | 0 ( 0.0%)         | 1 ( 4.6%)       | >0.99                | 0 ( 0.0%)       | NA                   |
| ACEI                               | 0 ( 0.0%)         | 0 ( 0.0%)       | NA                   | 1 ( 4.2%)       | >0.99                |
| AII RA                             | 13 ( 59.1%)       | 8 ( 36.4%)      | 0.23                 | 9 ( 37.5%)      | 0.24                 |
| CCB                                | 1 ( 4.6%)         | 1 ( 4.6%)       | >0.99                | 1 ( 4.2%)       | >0.99                |
| Vasodilator                        | 2 ( 9.1%)         | 0 ( 0.0%)       | 0.49                 | 3 ( 12.5%)      | >0.99                |
| Mixed-Drug                         | 6 ( 27.3%)        | 11 ( 50.0%)     | 0.22                 | 9 ( 37.5%)      | 0.54                 |

Abbreviations: ACEI, Angiotensin-Converting Enzyme Inhibitor; AII RA, Angiotensin II Receptor Antagonist; CCB, Calcium channel blockers.

<sup>a</sup> Data were collected with medical records at first visit.

<sup>b</sup> Fisher exact test was used to compare mean values between placebo and ADR-1 or ADR-3 groups.
